# Supplementary material for: Efficient parametrization and deployment of constant potential models based on automatic differentiation: application for simulating heterogeneous M–N–C catalytic electrodes
Source: Royal Society of Chemistry journal article supplement (doi:10.1039/d5cp02501j), 2025-01-01
Supplement: d5cp02501j1.pdf [file d5cp02501j1.pdf]

## Supplementary Information

|                                                                                                                                                                                                                                                                                                                                                                                                                                                                                                                                                         |   |
|---------------------------------------------------------------------------------------------------------------------------------------------------------------------------------------------------------------------------------------------------------------------------------------------------------------------------------------------------------------------------------------------------------------------------------------------------------------------------------------------------------------------------------------------------------|---|
| Fig. S 1 Atomic type setting. All environment C atoms share the same parameters (C1), while all symmetrically unique central atoms have their unique parameters (C2, C3, C4, C5, N, Fe) .....                                                                                                                                                                                                                                                                                                                                                           | 2 |
| Fig. S 2 The distribution of CO <sub>2</sub> position under different bias potentials :(a) Reaction coordinate distribution in different windows for constP condition (7V). The reaction coordinate is defined as the distance between the C in CO <sub>2</sub> and electrode surface. (b) The violin plot of the distance between C in CO <sub>2</sub> and doped Fe atom in xy plane. ....                                                                                                                                                             | 3 |
| Fig. S 3 Comparison of the probability distribution of the water orientation within inner water layer (within 2.0~4.5 Å from the electrode surface). The $\theta$ stands for the angle between the bisector of adsorbed water molecules and the surface normal. Two vertical dash lines at 50° and 137° stand for most probable $\theta$ for positively and negatively charged electrode, respectively, and the corresponding configuration are shown around the vertical dash line, the black thick horizontal line stands for electrode surface. .... | 4 |
| Table S 1 parameters in Fe-N-C electrode model .....                                                                                                                                                                                                                                                                                                                                                                                                                                                                                                    | 5 |
| Table S 2 Adsorption energy of CO <sub>2</sub> on electrode calculated by DFT and MD.....                                                                                                                                                                                                                                                                                                                                                                                                                                                               | 6 |
| Link 1 <a href="#">DMFF/dmff/admp/qeq.py at devel · deepmodeling/DMFF · GitHub</a> .....                                                                                                                                                                                                                                                                                                                                                                                                                                                                | 7 |

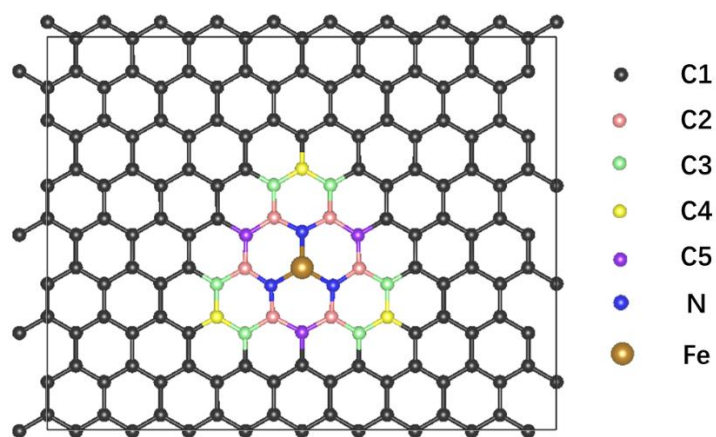

Fig. S 1 Atomic type setting. All environment C atoms share the same parameters (C1), while all symmetrically unique central atoms have their unique parameters (C2, C3, C4, C5, N, Fe)

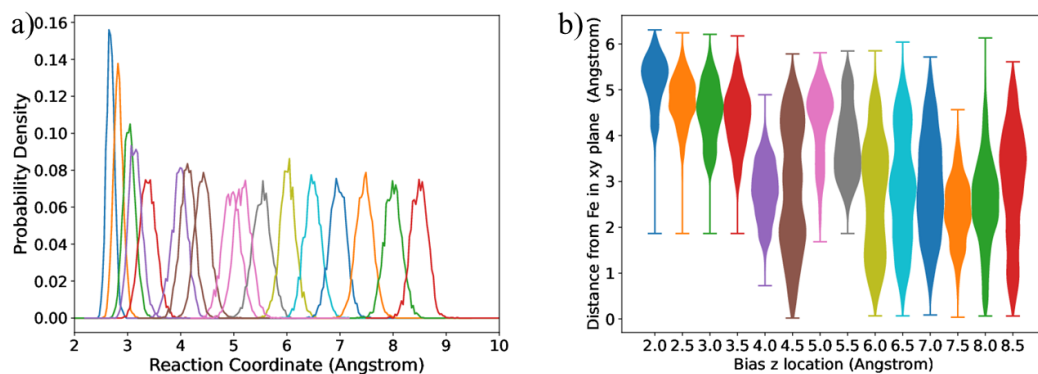

Fig. S 2 The distribution of CO<sub>2</sub> position under different bias potentials :(a) Reaction coordinate distribution in different windows for constP condition (7V). The reaction coordinate is defined as the distance between the C in CO<sub>2</sub> and electrode surface. (b) The violin plot of the distance between C in CO<sub>2</sub> and doped Fe atom in xy plane.

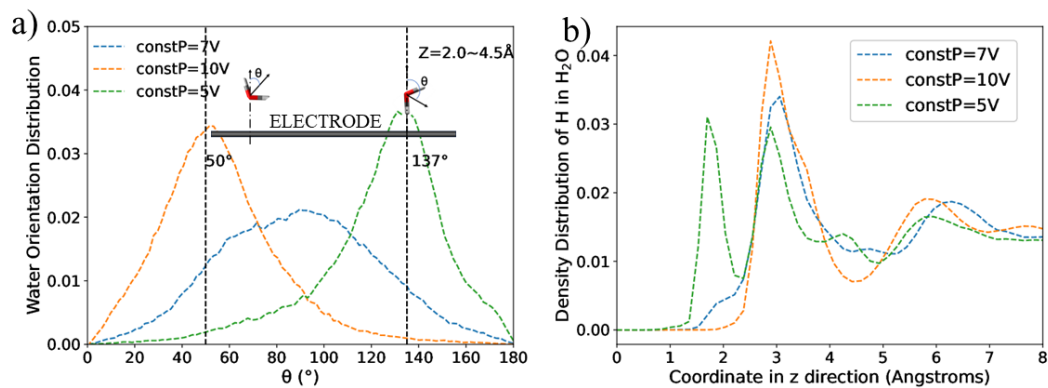

Fig. S 3 Comparison of water orientation under different bias potential: (a) The probability distribution of the water orientation within inner water layer (within 2.0~4.5 Å from the electrode surface). The  $\theta$  stands for the angle between the bisector of adsorbed water molecules and the surface normal. Two vertical dash lines at  $50^\circ$  and  $137^\circ$  stand for most probable  $\theta$  for positively and negatively charged electrode, respectively, and the corresponding configuration are shown around the vertical dash line, the black thick horizontal line stands for electrode surface. (b) probability density distribution of distance between oxygen atom in water and electrode surface.

Table S 1 parameters in Fe-N-C electrode model

|    | $\chi$<br>(kJ·mol <sup>-1</sup> ·e <sup>-1</sup> ) | $J$<br>(kJ·mol <sup>-1</sup> ·e <sup>-2</sup> ) | $\eta$<br>(angstrom) | $\varepsilon$<br>(kJ·mol <sup>-1</sup> ) | $\sigma$<br>(nm) |
|----|----------------------------------------------------|-------------------------------------------------|----------------------|------------------------------------------|------------------|
| C1 | 651.12496677                                       | -4164.829436                                    | 0.10928332           | 0.69067923                               | 0.29762701       |
| C2 | 510.40392156                                       | -6598.437796                                    | 0.07218767           | 0.69067923                               | 0.29762701       |
| C3 | 645.92171508                                       | -23412.16716                                    | 0.02274385           | 0.69067923                               | 0.29762701       |
| C4 | 644.80942378                                       | -4078.440621                                    | 0.11069275           | 0.69067923                               | 0.29762701       |
| C5 | 648.81564144                                       | -4341.428043                                    | 0.10515459           | 0.69067923                               | 0.29762701       |
| N  | 1785.28391366                                      | -5086.041613                                    | 0.06959997           | 0.09944425                               | 0.31275400       |
| Fe | 479.4279537                                        | -11302.57032                                    | 0.04676696           | 0.51379945                               | 0.19529668       |

Table S 2 Adsorption energy of CO<sub>2</sub> on electrode calculated by DFT and classical forcefield

| Adsorption Site | DFT<br>(kJ·mol <sup>-1</sup> ) | Classical Forcefield<br>(kJ·mol <sup>-1</sup> ) |
|-----------------|--------------------------------|-------------------------------------------------|
| C               | -8.37                          | -17.95                                          |
| Fe              | -18.91                         | -26.64                                          |

Both DFT and calculation under our classical forcefield consider only one CO<sub>2</sub> molecule and the electrode. The DFT setup uses identical computational details under vacuum conditions.

Link 1 [DMFF/dmff/admp/peq.py at devel · deepmodeling/DMFF · GitHub](#)
